# Supplementary material for: Phenotypic Adaptation of Pseudomonas aeruginosa in the Presence of Siderophore-Antibiotic Conjugates during Epithelial Cell Infection
Source: MDPI journal article supplement (doi:10.3390/microorganisms8111820), 2020-11-18
Supplement: s1 [file s1]

## Supplemental materials

# Phenotypic adaptation of *Pseudomonas aeruginosa* in the presence of siderophore-antibiotic conjugates during epithelial cell infection

**Table S1.** Strains and plasmids used in this study.

| Strain                                         | Collection ID | Relevant characteristics                                                            | Reference |
|------------------------------------------------|---------------|-------------------------------------------------------------------------------------|-----------|
| <b><i>Pseudomonas aeruginosa</i></b>           |               |                                                                                     |           |
| PAO1                                           | PAO1          | Wild-type strain                                                                    |           |
| $\Delta pvdF\Delta pchA$                       | PAS283        | PAO1; <i>pvdF</i> and <i>pchA</i> chromosomally deleted                             | [1]       |
| $\Delta pvdF\Delta pchA\Delta pfeA$            | PAS294        | PAO1; <i>pvdF</i> , <i>pchA</i> and <i>pfeA</i> chromosomally deleted               | [2]       |
| $\Delta pvdF\Delta pchA\Delta pirA$            | PAS348        | PAO1; <i>pvdF</i> , <i>pchA</i> and <i>pirA</i> chromosomally deleted               | [1]       |
| $\Delta pvdF\Delta pchA\Delta pfeA\Delta pirA$ | PAS351        | PAO1; <i>pvdF</i> , <i>pchA</i> , <i>pfeA</i> and <i>pirA</i> chromosomally deleted | [1]       |
| $\Delta pvdF\Delta pchA\Delta fiuA$            | PAS534        | PAO1; <i>pvdF</i> , <i>pchA</i> and <i>fiuA</i> chromosomally deleted               | [3]       |
| <i>pfeEmcherry</i>                             | PAS355        | PAO1; <i>pfeEmcherry</i> chromosomally integrated                                   | [4]       |

**Table S2.** Primers used for RT-qPCR analysis

| Primer ID      | Target       | Sequence                 |
|----------------|--------------|--------------------------|
| <i>uvrD</i> F  | <i>uvrD</i>  | CTACGGTAGCGAGACCTACAACAA |
| <i>uvrD</i> R  | <i>uvrD</i>  | GCGGCTGACGGTATTGGA       |
| <i>GAPDH</i> F | <i>GAPDH</i> | TGCACCACCAACTGCTTAGC     |
| <i>GAPDH</i> R | <i>GAPDH</i> | GGCATGGACTGTGGTCATGAG    |
| <i>aprA</i> F  | <i>aprA</i>  | AACCAGAAGATCAACCTCAACGA  |
| <i>aprA</i> R  | <i>aprA</i>  | TCGACACATTGCCCTTCAAC     |
| <i>exoY</i> F  | <i>exoY</i>  | AATGGATGGCGGAGCCTATA     |
| <i>exoY</i> R  | <i>exoY</i>  | CAAGGCGTTGCCGAGAGAT      |
| <i>lasB</i> F  | <i>lasB</i>  | CGCCTGGGCGAGAACA         |

|                |              |                          |
|----------------|--------------|--------------------------|
| <i>lasB</i> R  | <i>lasB</i>  | GGGAATCAGGTAGGAGACGTTGT  |
| <i>phzA2</i> F | <i>phzA2</i> | GGCACAACGTGCGGATCT       |
| <i>phzA2</i> R | <i>phzA2</i> | CGCACTCGACCCAGAAGTG      |
| <i>piv</i> F   | <i>piv</i>   | GCGTGGGCCTGAAAACG        |
| <i>piv</i> R   | <i>piv</i>   | CGATCCATTCGAGGGTTGTC     |
| <i>toxA</i> F  | <i>toxA</i>  | CCCGGCGAAGCATGAC         |
| <i>toxA</i> R  | <i>toxA</i>  | GGGAAATGCAGGCGATGA       |
| <i>amrZ</i> F  | <i>amrZ</i>  | TCGCTCGCAGCCATCAC        |
| <i>amrZ</i> R  | <i>amrZ</i>  | TCGAGTCGGGCGATGATC       |
| <i>fecA</i> F  | <i>fecA</i>  | GATCGACGACCTGATCCTCAA    |
| <i>fecA</i> R  | <i>fecA</i>  | GGTCATCGCCGAAAACGT       |
| <i>pirA</i> F  | <i>pirA</i>  | GCCTGAACGCTTCCCAAA       |
| <i>pirA</i> R  | <i>pirA</i>  | TGAAGGCCCGTGCGATA        |
| <i>pfeA</i> F  | <i>pfeA</i>  | GCCGAGACCAGCGTGAAC       |
| <i>pfeA</i> F  | <i>pfeA</i>  | GGCCGGATTGATCTTGTT       |
| <i>fpvA</i> F  | <i>fpvA</i>  | AGCCGCCTACCAGGATAAGC     |
| <i>fpvA</i> R  | <i>fpvA</i>  | TGCCGTAATAGACGCTGGTTT    |
| <i>fptA</i> F  | <i>fptA</i>  | GCGCCTGGGCTACAAGATC      |
| <i>fptA</i> R  | <i>fptA</i>  | CCGTAGCGTTGTTCCAGTT      |
| <i>foxA</i> F  | <i>foxA</i>  | AAGGGCTCGGATACCCAGTT     |
| <i>foxA</i> R  | <i>foxA</i>  | CGTTGGGATCGTGTTGCA       |
| <i>fiuA</i> F  | <i>fiuA</i>  | GCCGCGACAAGAAGTTCAG      |
| <i>fiuA</i> R  | <i>fiuA</i>  | ACGACTCCGCATAGGAGATATAGG |
| <i>feoA</i> F  | <i>feoA</i>  | CCTACCGCATCACCGTTAT      |
| <i>feoA</i> R  | <i>feoA</i>  | ACAGGCGTTGGCGATAGC       |
| <i>hasR</i> F  | <i>hasR</i>  | AGCGCCTGCAGTTCAGCTA      |
| <i>hasR</i> R  | <i>hasR</i>  | GTTCTCGGTGTTGAGCATGTTG   |
| <i>phuR</i> F  | <i>phuR</i>  | GGTCGAACTGCCCAACGA       |
| <i>phuR</i> R  | <i>phuR</i>  | TACGATGTCCGGATCGACGTA    |

---

11

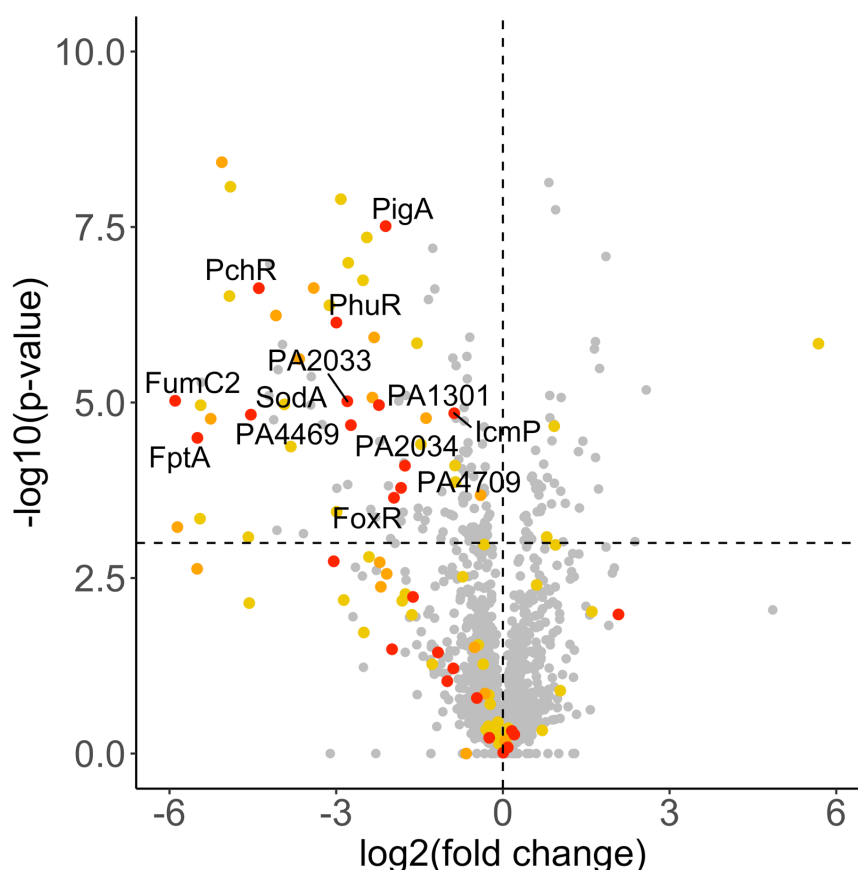

12

13 **Figure S1. Differential production of iron-regulated proteins in the presence of ALBO based on**  
 14 **the Palma, Worgall, and Quadri (2003) and Ochsner et al. (2002) studies [5,6].** Both studies were  
 15 transcriptome analyses of the *P. aeruginosa* response to iron. The analysis presented here was performed  
 16 on *P. aeruginosa* PAO1 cells after a 3-h infection of A549 epithelial cells in RPMI medium, in the  
 17 presence or absence of 10  $\mu$ M ALBO. The yellow points correspond to proteins identified in one of the  
 18 two analyses, the orange points to proteins identified in the two analyses, and the red points to proteins  
 19 belonging to the direct Fur regulon, as described in the Collectf database.

20

21

## 22 **Synthesis of TCVL6.**

### 23 **General informations**

24 TCVL6 was synthesized as described in 1S Scheme. Linezolid was purchased from Sigma-  
 25 Aldrich. Protected TCV **1** and linezolid-azide derivative **2** were synthesized according  
 26 previously described protocols [7,8]. All reactions were carried out under argon (technical

quality, Air products). Solvents used were of analytical grade purity (>99.9%). When necessary, solvents and bases were purchased extra-dry. All other chemicals were obtained from commercial suppliers and were used as received, unless otherwise stated. All reactions were monitored by thin-layer chromatography (TLC) using *Merck* precoated silica gel 60F<sup>254</sup> (0.25 mm). TLC are visualized using UV (254 nm/365 nm, *Vilber Lourmat*, VL-4LC) and/or using classical revelation mixtures (sulfuric vaniline, potassium permanganate, ninhydrin reagent). Final conjugate **3** was also detected on TLC using a 2% hydromethanolic solution of FeCl<sub>3</sub> (2%). Before chromatographic purification reaction mixtures were adsorbed on silica gel (60-200 µm, VWR Chemicals). Chromatographic purifications were performed on a *Reveleris* (*Grace Davison Discovery Sciences*) purification device using PuriFlash® pre-packed silica gel columns (*Interchim*, Montluçon, France). NMR spectra were recorded on Bruker Avance 400 (<sup>1</sup>H: 400 MHz, <sup>13</sup>C: 100 MHz, <sup>19</sup>F : 376 MHz) or Avance 500 (<sup>1</sup>H: 500 MHz, <sup>13</sup>C: 125 MHz, <sup>19</sup>F : 470 MHz), using the residual non-deuterated solvent as reference. The chemical shifts (δ) and coupling constants (*J*) are expressed in ppm and hertz respectively. Multiplicity is indicated as follows: s for singlet, d for doublet, t for triplet, q for quadruplet, quint for quintuplet and m for a multiplet. The letter "b" before the multiplicity indicates a broadened signal. Mass spectra were recorded in the *Service Commun d'Analyses (SCA) de la Faculté de Pharmacie de l'Université de Strasbourg* and were measured in ES-TOF experiments on a *Bruker Daltonic* MicroTOF mass spectrometer. LC/HRMS were measured after calibration on an *Agilent* QToF.

## Protocol

Linezolid azide **2** (1 eq.) and alkyne-vector **1** (1,2 eq.) were solubilized in THF (final concentration 0.1 M). An aqueous solution of CuSO<sub>4</sub> (200 mg/mL, 1 eq.) and sodium ascorbate (5 eq.) were successively added [9]. The mixture was sonicated and further stirred at 20°C

under argon till the total consumption of limiting reagent (linezolid azide). The mixture was then filtered through a celite pad and the filtrate was adsorbed on silical gel. The crude mixture was then purified on silica gel using a gradient of EtOH in CH<sub>2</sub>Cl<sub>2</sub>. The resulting white solid was dissolved in the mixture CH<sub>2</sub>Cl<sub>2</sub>/TFA/Triisopropylsilane/EtOH (70/20/5/5, 5 mL for 0.1 mmol of starting linezolid azide **2**). The solution was stirred at 20°C till the total consumption of the starting material. Solvents were then evaporated from the mixture under reduced pressure. The oily residue was dissolved in a minimum volume of THF then cyclohexane was added dropwise till the precipitation of the expected conjugate as a thin powder. The pure conjugate was filtered off on a Hirsch funnel.

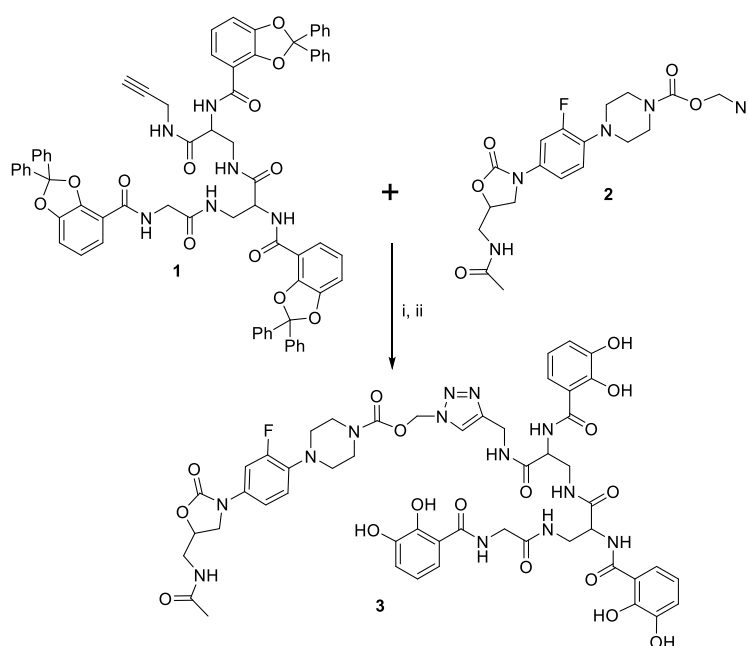

**Scheme S1: Synthesis of TCVL6 (3).** i. CuSO<sub>4</sub>, sodium ascorbate, THF/H<sub>2</sub>O, ((, 20°C. ii. CH<sub>2</sub>Cl<sub>2</sub>/TFA/Triisopropylsilane/EtOH (70/20/5/5, 20°C.

**Spectroscopic analysis of TCVL6.**

**<sup>1</sup>H NMR** (500 MHz, DMSO-*d*<sub>6</sub>): δ 11.98 (s, 1H), 11.73 (m, 2H), 9.05 (br s, 3H), 8.79 (s, 1H), 8.56 (d, *J* = 6.9 Hz, 1H), 8.53 (d, *J* = 6.9 Hz, 1H), 8.45 (t, *J* = 5.5 Hz, 1H), 8.18 (t, *J* = 5.5 Hz, 1H), 8.02 (t, *J* = 5.5 Hz, 1H), 7.93 (t, *J* = 5.5 Hz, 1H), 7.81 (s, 1H), 7.46 (t, *J* = 7.2 Hz, 1H), 7.28-7.22 (m, 1H), 7.08-6.99 (m, 3H), 6.95-6.89 (m, 1H), 6.84-6.78 (m, 1H), 6.72-6.66 (m, 3H), 6.49-6.40 (m, 3H), 6.03 (s, 2H), 4.35-4.28 (m, 1H), 4.19-4.08 (m, 2H), 4.02-3.91 (m, 2H), 3.89-3.85 (m, 1H), 3.71-3.65 (m, 1H), 3.55-2.91 (m, 14H), 1.44 (s, 3H). **<sup>19</sup>F NMR** (125 MHz, DMSO-*d*<sub>6</sub>): δ -73.72, -121.19. **<sup>13</sup>C NMR** (125 MHz, DMSO-*d*<sub>6</sub>): δ 169.7, 169.6, 169.5, 169.4, 169.3, 169.2, 169.1, 162.5, 149.2, 149.0, 146.1, 146.0, 145.4, 137.1, 132.8, 129.7, 128.7, 124.1, 119.9, 118.9, 118.8, 118.2, 118.1, 117.8, 117.7, 115.5, 114.1, 71.6, 68.4, 53.9, 53.8, 53.7, 50.1, 47.3, 47.2, 43.7, 42.4, 41.5, 10.5, 40.3, 40.2, 40.1, 35.9, 30.9, 27.5, 23.4, 23.3, 22.5, 21.8, 21.7. **HRMS:** C<sub>50</sub>H<sub>54</sub>FN<sub>13</sub>O<sub>17</sub>: calcd: 1127.37447, found: 1127.37501.

#### LC-HRMS Spectra of compound 3 (TCVL6 )

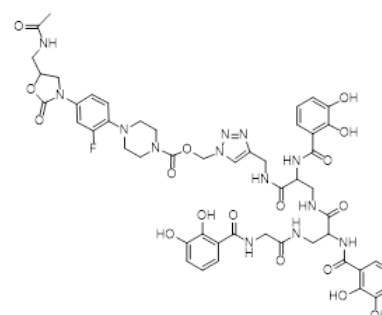

Chemical Formula: C<sub>50</sub>H<sub>54</sub>FN<sub>13</sub>O<sub>17</sub>  
 Exact Mass: 1127.37447  
 Molecular Weight: 1128.05440

Data Filename: QT11799.d Sample Name: NZ108  
 Inj. Vol: 0.1 Position: P1-B3  
 Instrument Name: SCA Illkirch QToF User Name: PW  
 Acq Method: C18-2,1x5x1,8DMSO.m Acquired Time: 2/4/2016 12:07:19 PM  
 IRM Calibration Status: Success DA Method: C18-2,1x5x1,8.m  
 Comment:

Sample Group: Info.

# User Chromatograms

Fragmentor Voltage: 120 Collision Energy: 0 Ionization Mode: ESI

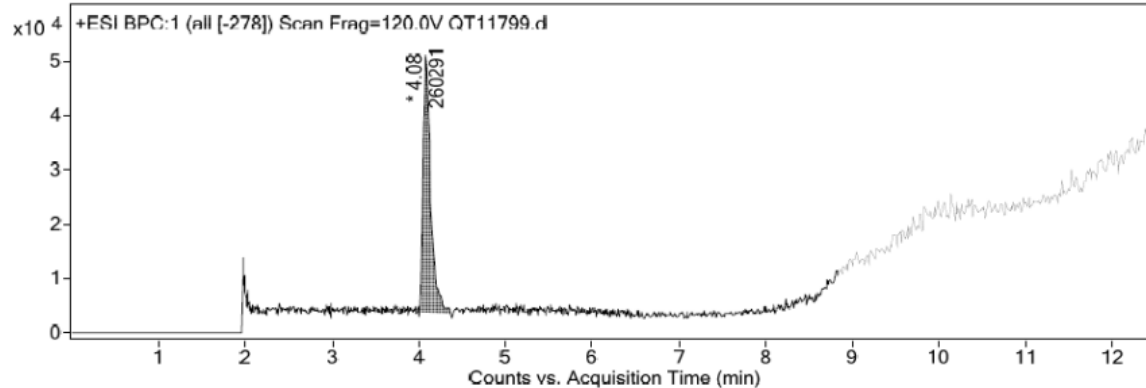

## Integration Peak List

| Start | RT   | End  | Height | Area   | Area % | AreaSum% |
|-------|------|------|--------|--------|--------|----------|
| 3.97  | 4.08 | 4.37 | 47512  | 260291 | 100    | 100      |

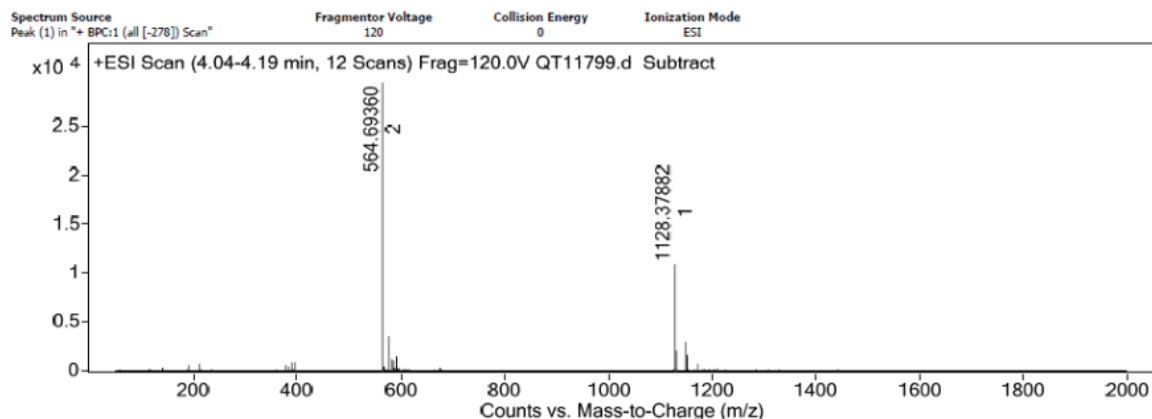

## Peak List

| m/z        | z | Abund   | Formula              | Ion      |
|------------|---|---------|----------------------|----------|
| 564.6936   | 2 | 29418.6 | C50 H56 F N13 O17    | (M+2H)+2 |
| 565.19508  | 2 | 17423.8 | C50 H56 F N13 O17    | (M+2H)+2 |
| 565.69599  | 2 | 6106.5  | C50 H56 F N13 O17    | (M+2H)+2 |
| 575.68361  | 2 | 3582.9  |                      |          |
| 576.18663  | 2 | 2021    |                      |          |
| 1128.37882 | 1 | 10820.6 | C50 H55 F N13 O17    | (M+H)+   |
| 1129.38218 | 1 | 6280.4  | C50 H55 F N13 O17    | (M+H)+   |
| 1130.38535 | 1 | 2133    | C50 H55 F N13 O17    | (M+H)+   |
| 1150.36048 | 1 | 2936.7  | C50 H54 F N13 Na O17 | (M+Na)+  |
| 1151.36413 | 1 | 1682.2  | C50 H54 F N13 Na O17 | (M+Na)+  |

#### Formula Calculator Results

| Formula           | Best | Mass       | Tgt Mass   | Diff (ppm) | Mz         | Ion Species          | Score |
|-------------------|------|------------|------------|------------|------------|----------------------|-------|
| C46 H50 F N19 O15 |      | 1127.37167 | 1127.37178 | 0.1        | 1128.37882 | C46 H51 F N19 O15    | 99.57 |
| C49 H49 N19 O14   |      | 1127.37166 | 1127.37064 | -0.91      | 1128.37882 | C49 H50 N19 O14      | 98.92 |
| C45 H54 F N15 O19 |      | 1127.37165 | 1127.37044 | -1.07      | 1128.37882 | C45 H55 F N15 O19    | 98.77 |
| C62 H50 F N11 O10 |      | 1127.3716  | 1127.37262 | 0.9        | 1128.37882 | C62 H51 F N11 O10    | 98.03 |
| C53 H53 N13 O16   |      | 1127.37162 | 1127.37332 | 1.51       | 1128.37882 | C53 H54 N13 O16      | 97.9  |
| C48 H53 N15 O18   |      | 1127.37164 | 1127.3693  | -2.08      | 1128.37882 | C48 H54 N15 O18      | 96.54 |
| C50 H54 F N13 O17 | TRUE | 1127.37163 | 1127.37447 | 2.52       | 1128.37882 | C50 H55 F N13 O17    | 95.18 |
| C54 H49 N17 O12   |      | 1127.37164 | 1127.37466 | 2.68       | 1128.37882 | C54 H50 N17 O12      | 94.19 |
| C57 H50 F N13 O12 |      | 1127.37162 | 1127.36859 | -2.68      | 1128.37882 | C57 H51 F N13 O12    | 94.08 |
| C51 H50 F N17 O13 |      | 1127.37165 | 1127.3758  | 3.69       | 1128.37882 | C51 H51 F N17 O13    | 90.37 |
| C46 H50 F N19 O15 |      | 1127.37139 | 1127.37178 | 0.34       | 1150.36048 | C46 H50 F N19 Na O15 | 98.44 |
| C49 H49 N19 O14   |      | 1127.37139 | 1127.37064 | -0.66      | 1150.36048 | C49 H49 N19 Na O14   | 98.12 |
| C45 H54 F N15 O19 |      | 1127.37137 | 1127.37044 | -0.82      | 1150.36048 | C45 H54 F N15 Na O19 | 98.11 |
| C48 H53 N15 O18   |      | 1127.37136 | 1127.3693  | -1.83      | 1150.36048 | C48 H53 N15 Na O18   | 96.2  |
| C62 H50 F N11 O10 |      | 1127.37132 | 1127.37262 | 1.15       | 1150.36048 | C62 H50 F N11 Na O10 | 96.17 |
| C53 H53 N13 O16   |      | 1127.37134 | 1127.37332 | 1.76       | 1150.36048 | C53 H53 N13 Na O16   | 96.08 |
| C57 H50 F N13 O12 |      | 1127.37134 | 1127.36859 | -2.43      | 1150.36048 | C57 H50 F N13 Na O12 | 93.62 |
| C50 H54 F N13 O17 | TRUE | 1127.37135 | 1127.37447 | 2.77       | 1150.36048 | C50 H54 F N13 Na O17 | 93.18 |
| C54 H49 N17 O12   |      | 1127.37136 | 1127.37466 | 2.92       | 1150.36048 | C54 H49 N17 Na O12   | 92.17 |
| C60 H49 N13 O11   |      | 1127.37133 | 1127.36745 | -3.45      | 1150.36048 | C60 H49 N13 Na O11   | 89.46 |
| C53 H53 N13 O16   |      | 1127.37264 | 1127.37332 | 0.6        | 564.6936   | C53 H55 N13 O16      | 99.64 |
| C46 H50 F N19 O15 |      | 1127.3727  | 1127.37178 | -0.81      | 564.6936   | C46 H52 F N19 O15    | 99.61 |
| C62 H50 F N11 O10 |      | 1127.37262 | 1127.37262 | -0.01      | 564.6936   | C62 H52 F N11 O10    | 98.85 |
| C50 H54 F N13 O17 | TRUE | 1127.37265 | 1127.37447 | 1.61       | 564.6936   | C50 H56 F N13 O17    | 98.67 |
| C49 H49 N19 O14   |      | 1127.37269 | 1127.37064 | -1.82      | 564.6936   | C49 H51 N19 O14      | 98.32 |
| C54 H49 N17 O12   |      | 1127.37267 | 1127.37466 | 1.77       | 564.6936   | C54 H51 N17 O12      | 98.14 |
| C45 H54 F N15 O19 |      | 1127.37267 | 1127.37044 | -1.98      | 564.6936   | C45 H56 F N15 O19    | 97.96 |
| C51 H50 F N17 O13 |      | 1127.37267 | 1127.3758  | 2.78       | 564.6936   | C51 H52 F N17 O13    | 96.21 |
| C48 H53 N15 O18   |      | 1127.37267 | 1127.3693  | -2.99      | 564.6936   | C48 H55 N15 O18      | 95.76 |
| C42 H53 N19 O19   |      | 1127.37271 | 1127.37651 | 3.37       | 564.6936   | C42 H55 N19 O19      | 94.43 |

91

92

## 93 References

- 94 1. Gasser, V.; Baco, E.; Cunrath, O.; August, P.S.; Perraud, Q.; Zill, N.; Schleberger, C.; Schmidt,  
95 A.; Paulen, A.; Bumann, D.; et al. Catechol siderophores repress the pyochelin pathway  
96 and activate the enterobactin pathway in *Pseudomonas aeruginosa*: an opportunity for  
97 siderophore-antibiotic conjugates development. *Environ. Microbiol.* **2016**, *18*, 819–832,  
98 doi:10.1111/1462-2920.13199.
- 99 2. Paulen, A.; Gasser, V.; Hoegy, F.; Perraud, Q.; Pesset, B.; Schalk, I.J.; Mislin, G.L.A.  
100 Synthesis and antibiotic activity of oxazolidinone-catechol conjugates against  
101 *Pseudomonas aeruginosa*. *Org. Biomol. Chem.* **2015**, *13*, 11567–11579,  
102 doi:10.1039/c5ob01859e.
- 103 3. Normant, V.P.; Josts, I.; Kuhn, L.; Perraud, Q.; Fritsch, S.; Hammann, P.; Mislin, G.L.A.;  
104 Tidow, H.; Schalk, I.J. Nocardamine-dependent iron uptake in *Pseudomonas aeruginosa*:  
105 exclusive involvement of the FoxA outer membrane transporter. *ACS Chem. Biol.* **2020**,  
106 *15*, 2741–2751. doi: 10.1021/acscchembio.0c00535. .
- 107 4. Perraud, Q.; Moynié, L.; Gasser, V.; Munier, M.; Godet, J.; Hoegy, F.; Mély, Y.; Mislin,  
108 G.L.A.; Naismith, J.H.; Schalk, I.J. A Key Role for the Periplasmic PfeE Esterase in Iron  
109 Acquisition via the Siderophore Enterobactin in *Pseudomonas aeruginosa*. *ACS Chem.*  
110 *Biol.* **2018**, *13*, 2603–2614, doi:10.1021/acscchembio.8b00543.
- 111 5. Palma, M.; Worgall, S.; Quadri, L.E.N. Transcriptome analysis of the *Pseudomonas*  
112 *aeruginosa* response to iron. *Arch. Microbiol.* **2003**, *180*, 374–379, doi:10.1007/s00203-  
113 003-0602-z.



- 114 6. Ochsner, U.A.; Wilderman, P.J.; Vasil, A.I.; Vasil, M.L. GeneChip expression analysis of the  
115 iron starvation response in *Pseudomonas aeruginosa*: identification of novel pyoverdine  
116 biosynthesis genes. *Mol. Microbiol.* **2002**, *45*, 1277–87.
- 117 7. Baco, E.; Hoegy, F.; Schalk, I.J.; Mislin, G.L. Diphenyl-benzo[1,3]dioxole-4-carboxylic acid  
118 pentafluorophenyl ester: a convenient catechol precursor in the synthesis of siderophore  
119 vectors suitable for antibiotic Trojan horse strategies. *Org. Biomol. Chem.* **2014**, *12*, 749–  
120 57, doi:10.1039/c3ob41990h.
- 121 8. Paulen, A.; Hoegy, F.; Roche, B.; Schalk, I.J.; Mislin, G.L.A. Synthesis of conjugates between  
122 oxazolidinone antibiotics and a pyochelin analogue. *Bioorg. Med. Chem. Lett.* **2017**, *27*,  
123 4867–4870, doi:10.1016/j.bmcl.2017.09.039.
- 124 9. Rostovtsev, V.V.; Green, L.G.; Fokin, V.V.; Sharpless, K.B. A Stepwise Huisgen Cycloaddition  
125 Process: Copper(I)-Catalyzed Regioselective “Ligation” of Azides and Terminal Alkynes.  
126 *Ang. Chem. Int. Ed.* **2002**, *41*, 2596–2599, doi:10.1002/1521-  
127 3773(20020715)41:14<2596::AID-ANIE2596>3.0.CO;2-4.
- 128

129
